# Supplementary material
Source: Springer Nature journal article supplement (https://www.springermedizin.de/resource/supplementary/12887_2014_1248_MOESM7_ESM.pdf/9476652)

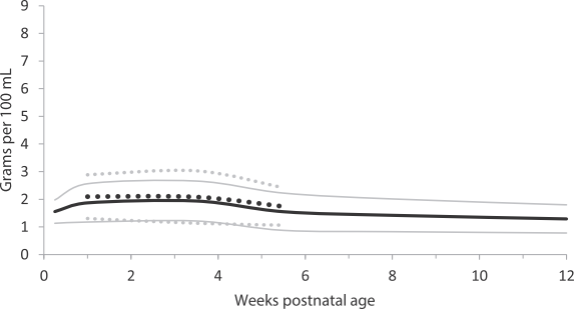

Supplement: MOESM7 [file 9476652]
